# Supplementary material for: Spectral and luminescent properties of ZnO–SiO2 core–shell nanoparticles with size-selected ZnO cores
Source: Royal Society of Chemistry journal article supplement (doi:10.1039/c4ra07959k), 2014-01-01
Supplement: c4ra07959k1.pdf [file c4ra07959k1.pdf]

## Electronic Supplementary information

### Spectral and luminescent properties of ZnO/SiO<sub>2</sub> nanoparticles with size-selected ZnO cores

**A.E. Raevskaya<sup>1</sup>, Ya.V. Panasiuk<sup>1</sup>, O.L. Stroyuk<sup>1\*</sup>, S.Ya. Kuchmiy<sup>1</sup>,  
V.M. Dzhagan<sup>2</sup>, A.G. Milekhin<sup>3,4</sup>, N.A. Yeryukov<sup>3</sup>, L.A. Sveshnikova<sup>3</sup>,  
E.E. Rodyakina<sup>3</sup>, V.F. Plyusnin<sup>5</sup>, D.R.T. Zahn<sup>2</sup>**

<sup>1</sup> L.V. Pysarzhevsky Institute of Physical Chemistry of National Academy of Sciences of Ukraine, Kyiv, Ukraine

<sup>2</sup> Semiconductor Physics, Technische Universität Chemnitz, Chemnitz, Germany

<sup>3</sup> Rzhanov Institute of Semiconductor Physics of Siberian Branch of Russian Academy of Sciences, Novosibirsk, Russian Federation

<sup>4</sup> Novosibirsk State University, Novosibirsk, Russian Federation

<sup>5</sup> Institute of Chemical Kinetics and Combustion of Siberian Branch of Russian Academy of Sciences, Novosibirsk, Russian Federation

**\*Author for correspondence:** Oleksandr L. Stroyuk, L.V. Pysarzhevsky Institute of Physical Chemistry of National Academy of Sciences of Ukraine, Department of Photochemistry, 31 prosp. Nauky, 03028, Kyiv, Ukraine, *e-mail:* stroyuk@inphyschem-nas.kiev.ua; alstroyuk@ukr.net, tel./fax: +380 44 525 02 70.

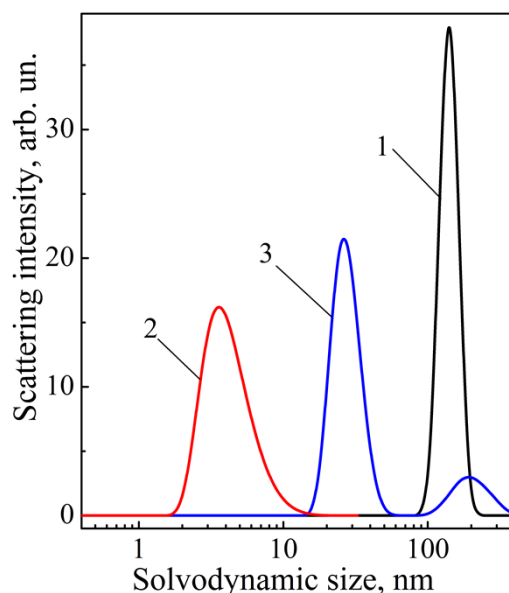

**Figure S1.** Hydrodynamic size distribution of colloidal SiO<sub>2</sub> particles produced by TEOS hydrolysis in the absence of ZnO NPs (curve 1), freshly prepared ZnO/SiO<sub>2</sub> (curve 2) and ZnO/SiO<sub>2</sub> NPs heated at 90 °C for 180 min (curve 3). [ZnO] = 0.02 M, [TEOS] = [NEt<sub>4</sub>OH] = 0.04 M.

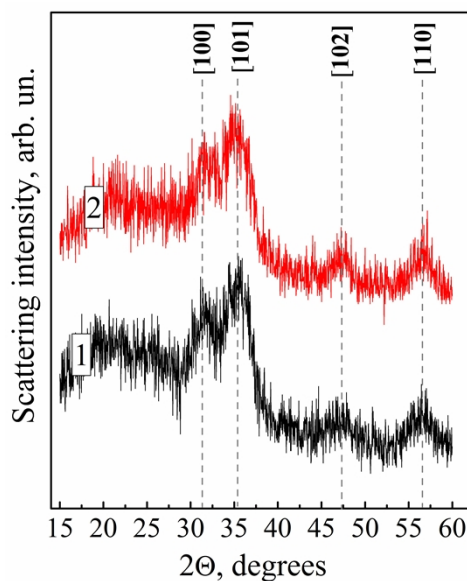

**Figure S2.** X-ray diffraction patterns of core-shell ZnO/SiO<sub>2</sub> NPs (curve 1) and ZnO-SiO<sub>2</sub> composite synthesized by co-hydrolysis of ZnAc<sub>2</sub> and TEOS (curve 2). The NPs were synthesized at [ZnO] = 0.02 M, [TEOS] = [NEt<sub>4</sub>OH] = 0.05 M. Dashed lines represent characteristic maxima of hexagonal zincite (JCPDS card # 36–1451).

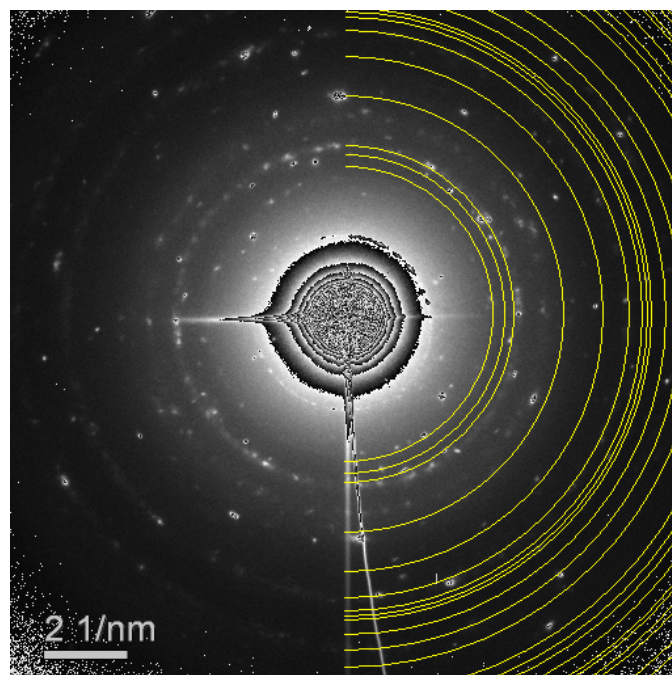

**Figure S3.** Selected area electron diffraction pattern of ZnO/SiO<sub>2</sub> NPs produced at 1 min ageing of ZnO core before deposition of a silica shell.

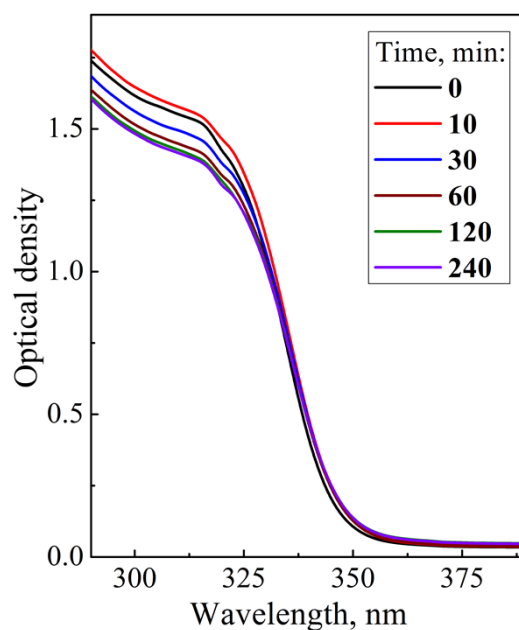

**Figure S4.** Absorption spectra of core/shell ZnO/SiO<sub>2</sub> NPs heated at 90 °C for 0–240 min. Cuvette – 1.0 mm. [ZnO] = 0.02 M, [TEOS] = [NEt<sub>4</sub>OH] = 0.04 M.

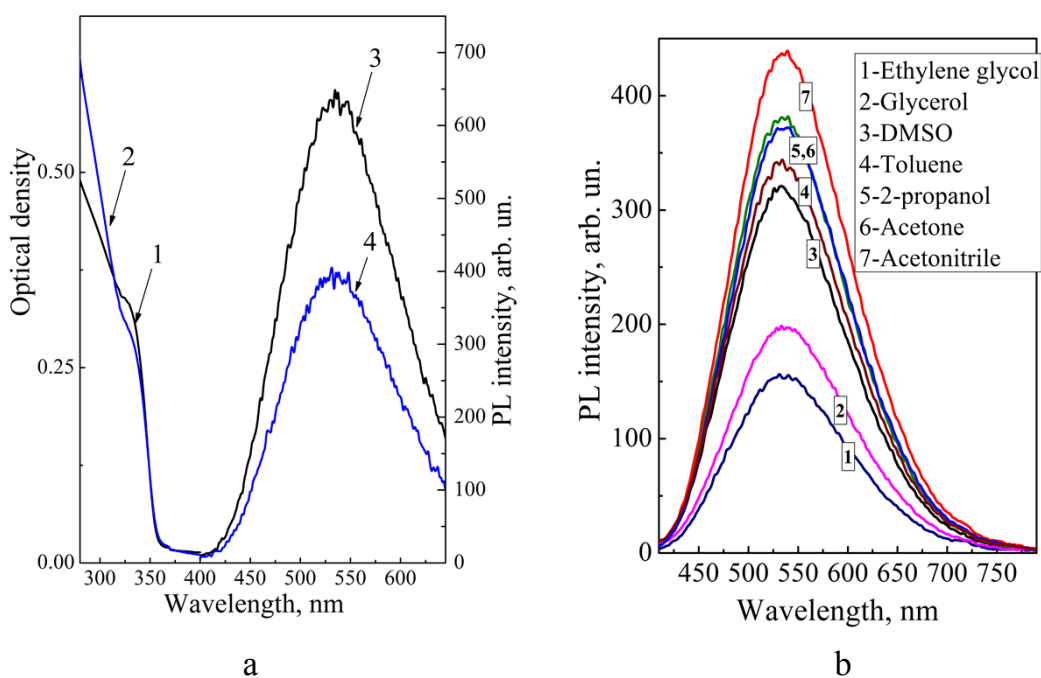

**Figure S5.** Absorption (curves 1, 2) and PL (curves 3, 4) spectra of ZnO/SiO<sub>2</sub> colloidal NPs diluted in 20 times by DMSO (curves 1, 3) and water (curves 2, 4) and aged for 14 days. Original zinc oxide concentration is 0.02 M, cuvette – 10.0 mm. (b) PL spectra of ZnO/SiO<sub>2</sub> colloid in DMSO and 1:1 (v/v) mixtures of such colloids with acetone, acetonitrile, ethylene glycol, glycerol, 2-propanol, and toluene. Cuvette – 10.0 mm. *Note:* ZnO/SiO<sub>2</sub> colloids in DMSO should be subjected to the thermal treatment at 60–80 °C for 30 min prior to dilution with water to increase stability of the ZnO/SiO<sub>2</sub> NPs toward aggregation in aqueous environment.

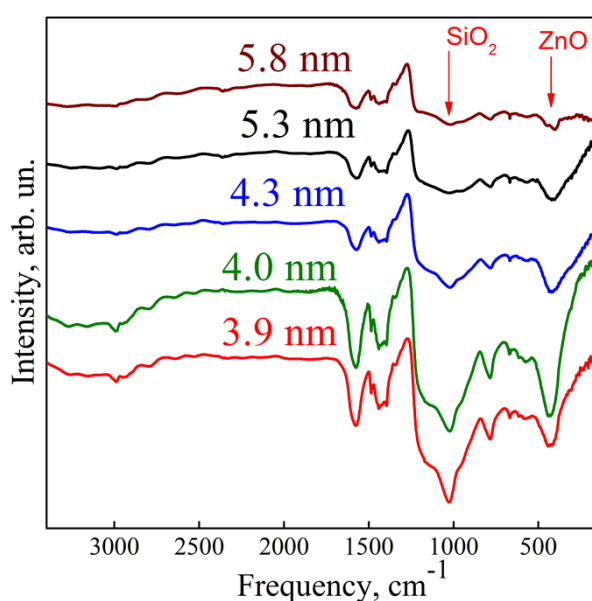

**Figure S6.** FTIR reflection/absorption spectra of ZnO/SiO<sub>2</sub> NPs produced from ZnO NPs with different size.

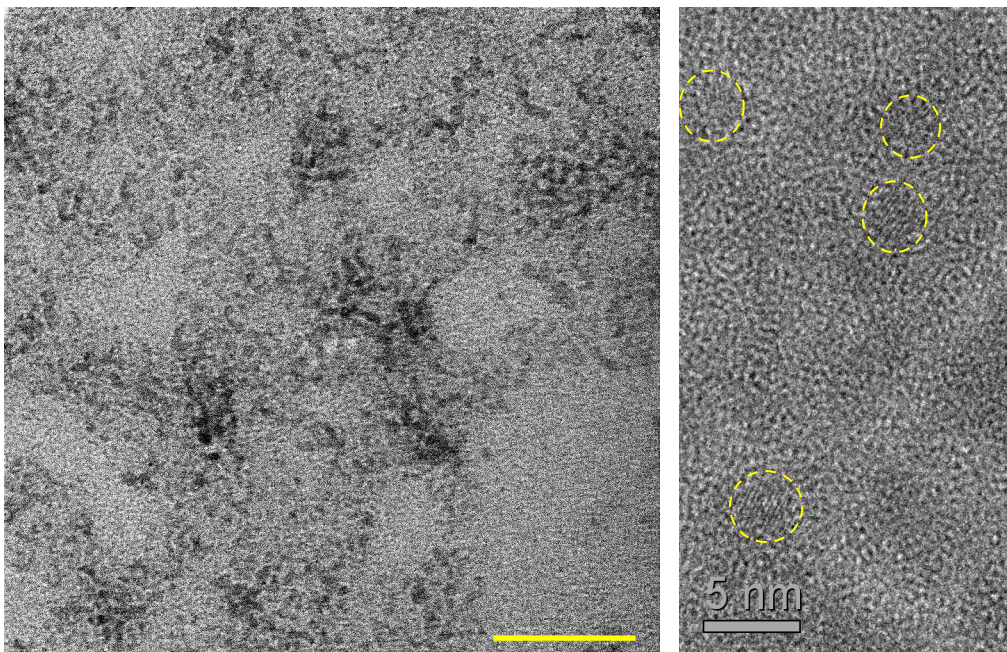

**Figure S7.** TEM (a) and HRTEM (b) images of ZnO-SiO<sub>2</sub> NPs produced by co-hydrolysis of TEOS and ZnAc<sub>2</sub> (0.02 M) at [TEOS] = 0.05 M.

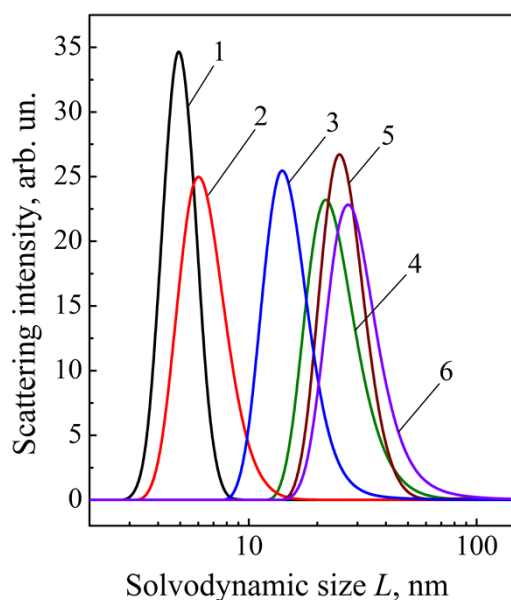

**Figure S8.** Hydrodynamic size distribution of ZnO-SiO<sub>2</sub> NPs produced by co-hydrolysis of TEOS and ZnAc<sub>2</sub> (0.02 M) at [TEOS] = 0.01 M (curve 1), 0.02 M (2), 0.05 M (3), 0.08 M (4), 0.12 M (5), and 0.20 M (6). [NEt<sub>4</sub>OH] = 0.02 M + 0.5×[TEOS].
